# Supplementary material for: Deciphering the Prognostic and Predictive Value of Urinary CXCL10 in Kidney Recipients With BK Virus Reactivation
Source: PubMed Central journal article supplement (PMC7759001; doi:10.3389/fimmu.2020.604353), 2020-12-10

***Supplemental Appendix for***

**Deciphering the prognostic and predictive value of urinary CXCL10 in kidney recipients  
with BK virus reactivation**

**Table of contents**

|                                    |                |
|------------------------------------|----------------|
| <b>SUPPLEMENTAL RESULTS .....</b>  | <b>Page 2</b>  |
| <b>Supplemental Table 1 .....</b>  | <b>Page 2</b>  |
| <b>Supplemental Table 2 .....</b>  | <b>Page 3</b>  |
| <b>Supplemental Table 3 .....</b>  | <b>Page 4</b>  |
| <b>Supplemental Table 4 .....</b>  | <b>Page 5</b>  |
| <b>Supplemental Table 5 .....</b>  | <b>Page 7</b>  |
| <b>Supplemental Figure 1 .....</b> | <b>Page 8</b>  |
| <b>Supplemental Figure 2 .....</b> | <b>Page 9</b>  |
| <b>Supplemental Figure 3 .....</b> | <b>Page 10</b> |

## SUPPLEMENTAL RESULTS

**Supplemental Table 1: Oligo sequences and probes used for transcript quantification by qPCR.**

| Gene    | Reference | Sequence                                                  | Localization |
|---------|-----------|-----------------------------------------------------------|--------------|
| BKV VP1 | J02038    | Sense: 5'-TGCTGATATTTGTGGCCTGTTTACTA-3'                   | 2355-2380    |
|         | K00058    | Antisense: 5'-CTCAGGCGGATCTTAAAATATCTTG-3'                | 2438-2414    |
|         | V01108    | Probe: 5-FAM-AGCTCTGGAACACAACAGTGGAGAGGCC <b>TAMRA</b> 3' | 2383-2410    |
| BAK     | Y13231    | Sense: 5' CCCACATCTGGAGCAGAGTCA 3'                        | 192-212      |
|         |           | Antisense: 5' CAGATGCCATTTTCAGGTCTTG 3'                   | 264-242      |
|         |           | 5' FAM CAGGTGACAAGTGACGGTGGTCTCCA <b>TAMRA</b> 3'         | 215-240      |

**Supplemental Table 2:** Patient and transplant characteristics in the cross-sectional study.

| <b>Variables</b>                                                   | <b>N=391 patients</b> |
|--------------------------------------------------------------------|-----------------------|
| <b>Recipient characteristics</b>                                   |                       |
| Men, <i>n (%)</i>                                                  | 241 (61.6)            |
| Age at transplantation (yr), <i>mean±SD</i>                        | 47.6±15.7             |
| Cause of ESRD                                                      |                       |
| GN, <i>n (%)</i>                                                   | 88 (22.5)             |
| Diabetes, <i>n (%)</i>                                             | 40 (10.2)             |
| Cystic/hereditary/congenital, <i>n (%)</i>                         | 91 (23.3)             |
| Secondary GN, <i>n (%)</i>                                         | 21 (5.4)              |
| Hypertension, <i>n (%)</i>                                         | 25 (6.4)              |
| Interstitial nephritis, <i>n (%)</i>                               | 43 (11.0)             |
| Miscellaneous conditions, <i>n (%)</i>                             | 6 (1.5)               |
| Cancer, <i>n (%)</i>                                               | 0                     |
| Etiology uncertain, <i>n (%)</i>                                   | 77 (19.7)             |
| <b>Transplant variables</b>                                        |                       |
| Donor age (yr), <i>mean±SD</i> <sup>a</sup>                        | 53.8±17.2             |
| Donor type <sup>b</sup>                                            |                       |
| Living donor, <i>n (%)</i>                                         | 107 (27.9)            |
| SCD, <i>n (%)</i>                                                  | 129 (33.6)            |
| ECD, <i>n (%)</i>                                                  | 148 (38.5)            |
| Retransplantation, <i>n (%)</i>                                    | 83 (21.2)             |
| Delayed graft function, <i>n (%)</i>                               | 169 (43.7)            |
| Preformed DSAs, <i>n (%)</i> <sup>c</sup>                          | 178 (46.5)            |
| <b>Immunosuppressive protocol</b>                                  |                       |
| Induction therapy, <i>n (%)</i> <sup>d</sup>                       | 369 (98.3)            |
| Basiliximab/Thymoglobuline®, <i>n (%)</i>                          | 186 (49.9)/178 (47.7) |
| Calcineurin inhibitor, <i>n (%)</i> <sup>e</sup>                   | 379 (98.2)            |
| Cyclosporin/tacrolimus, <i>n (%)</i>                               | 72 (18.7)/307 (79.5)  |
| Purine synthesis inhibitor, <i>n (%)</i> <sup>e</sup>              | 363 (94.0)            |
| Azathioprine/mycophenolic acid, <i>n (%)</i>                       | 10 (2.6)/353 (91.5)   |
| Mammalian target of rapamycin inhibitor, <i>n (%)</i> <sup>e</sup> | 28 (7.3)              |
| Steroids, <i>n (%)</i> <sup>e</sup>                                | 383 (99.2)            |

Abbreviations: DSAs, donor-specific antibodies; ECD, expanded-criteria donor; ESRD, end-stage renal disease; GN, glomerulonephritis; SCD, standard-criteria donor; SD, standard deviation. <sup>a</sup> Data not available (NA) for 3 patients. <sup>b</sup> NA for 7 patients. <sup>c</sup> NA for 8 patients. <sup>d</sup> NA for 18 patients. <sup>e</sup> NA for 5 patients.

**Supplemental Table 3:** Patient and transplant characteristics in the nested case-control study including 63 single patients with BKV-DNAemia.

| Variables                                             | N=63 patients       |
|-------------------------------------------------------|---------------------|
| <b>Recipient characteristics</b>                      |                     |
| Men, <i>n (%)</i>                                     | 35 (55.6)           |
| Age at transplantation (yr), <i>mean±SD</i>           | 50±17.0             |
| Cause of ESRD                                         |                     |
| GN, <i>n (%)</i>                                      | 15 (23.8)           |
| Diabetes, <i>n (%)</i>                                | 7 (11.1)            |
| Cystic/hereditary/congenital, <i>n (%)</i>            | 19 (30.2)           |
| Secondary GN, <i>n (%)</i>                            | 2 (3.2)             |
| Hypertension, <i>n (%)</i>                            | 5 (7.9)             |
| Interstitial nephritis, <i>n (%)</i>                  | 7 (11.1)            |
| Miscellaneous conditions, <i>n (%)</i>                | 0                   |
| Cancer, <i>n (%)</i>                                  | 0                   |
| Etiology uncertain, <i>n (%)</i>                      | 8 (12.7)            |
| <b>Transplant variables</b>                           |                     |
| Donor age (yr), <i>mean±SD</i>                        | 58±19.0             |
| Donor type <sup>a</sup>                               |                     |
| Living donor, <i>n (%)</i>                            | 16 (26.7)           |
| SCD, <i>n (%)</i>                                     | 14 (23.3)           |
| ECD, <i>n (%)</i>                                     | 30 (50.0)           |
| Retransplantation, <i>n (%)</i>                       | 10 (15.9)           |
| Delayed graft function, <i>n (%)</i>                  | 26 (41.3)           |
| Preformed DSAs, <i>n (%)</i>                          | 32 (50.8)           |
| <b>Immunosuppressive protocol</b>                     |                     |
| Induction therapy, <i>n (%)</i> <sup>b</sup>          | 59 (100)            |
| Basiliximab/Thymoglobuline®, <i>n (%)</i>             | 24 (40.7)/34 (57.6) |
| Calcineurin inhibitor, <i>n (%)</i>                   | 62 (98.4)           |
| Cyclosporin/tacrolimus, <i>n (%)</i>                  | 5 (7.9)/57 (90.5)   |
| Purine synthesis inhibitor, <i>n (%)</i>              | 62 (98.4)           |
| Azathioprine/mycophenolic acid, <i>n (%)</i>          | 1 (1.6)/61 (96.8)   |
| Mammalian target of rapamycin inhibitor, <i>n (%)</i> | 2 (3.2)             |
| Steroids, <i>n (%)</i>                                | 63 (100)            |

Abbreviations: DSAs, donor-specific antibodies; ECD, expanded-criteria donor; ESRD, end-stage renal disease; GN, glomerulonephritis; SCD, standard-criteria donor; SD, standard deviation. <sup>a</sup> Data not available (NA) for 3 patients. <sup>b</sup> NA for 4 patients

**Supplemental Table 4:** Sample characteristics in the nested case-control study including 63 single patients with BKV-DNAemia. The low-CXCL10 group was defined as uCXCL10/cr  $\leq 12.86$  ng/mmol, and the high-CXCL10 group was defined as uCXCL10/cr  $> 12.86$  ng/mmol. MVI is defined by the sum of the glomerulitis and peritubular capillaritis scores.

| Variables                                                                    | All patients<br>(N=63) | Low-CXCL10<br>group<br>(N=40) | High-CXCL10<br>group<br>(N=23) | P value |
|------------------------------------------------------------------------------|------------------------|-------------------------------|--------------------------------|---------|
| Time from transplantation to biopsy (mo), median (IQR)                       | 10 (19.0)              | 13 (25.5)                     | 6 (8.0)                        | 0.003   |
| <b>Indication of biopsy</b>                                                  |                        |                               |                                |         |
| Screening biopsy, n (%)                                                      | 4 (6.3)                | 2 (5.0)                       | 2 (8.7)                        | 0.97    |
| Clinically indicated biopsy, n (%)                                           | 59 (93.7)              | 38 (95.0)                     | 21 (91.3)                      |         |
| Rise in serum creatinine, n (%)                                              | 23 (39.0)              | 16 (42.1)                     | 7 (33.3)                       | 0.70    |
| Proteinuria, n (%)                                                           | 0                      | 0                             | 0                              |         |
| De novo DSAs, n (%)                                                          | 0                      | 0                             | 0                              |         |
| Control after rejection, n (%)                                               | 1 (1.7)                | 0                             | 1 (4.8)                        | 0.76    |
| BKV-DNAemia, n (%)                                                           | 35 (59.3)              | 22 (57.9)                     | 13 (61.9)                      | 0.98    |
| Other, n (%)                                                                 | 0                      | 0                             | 0                              |         |
| <b>Banff elementary lesions</b>                                              |                        |                               |                                |         |
| i score, mean $\pm$ SD <sup>a</sup>                                          | 0.21 $\pm$ 0.60        | 0.15 $\pm$ 0.54               | 0.30 $\pm$ 0.70                | 0.14    |
| t score, mean $\pm$ SD                                                       | 0.90 $\pm$ 1.29        | 0.78 $\pm$ 1.21               | 1.13 $\pm$ 1.42                | 0.37    |
| ci score, mean $\pm$ SD <sup>a</sup>                                         | 1.16 $\pm$ 1.07        | 1.21 $\pm$ 1.08               | 1.09 $\pm$ 1.08                | 0.67    |
| ct score, mean $\pm$ SD <sup>a</sup>                                         | 1.15 $\pm$ 1.05        | 1.18 $\pm$ 1.05               | 1.09 $\pm$ 1.08                | 0.71    |
| i-IFTA score, mean $\pm$ SD                                                  | 0.75 $\pm$ 1.09        | 0.80 $\pm$ 1.07               | 0.65 $\pm$ 1.15                | 0.45    |
| ti score, mean $\pm$ SD                                                      | 0.54 $\pm$ 0.96        | 0.53 $\pm$ 0.96               | 0.57 $\pm$ 0.99                | 0.92    |
| g score, mean $\pm$ SD                                                       | 0.24 $\pm$ 0.64        | 0.28 $\pm$ 0.68               | 0.17 $\pm$ 0.58                | 0.38    |
| ptc score, mean $\pm$ SD                                                     | 0.21 $\pm$ 0.60        | 0.10 $\pm$ 0.44               | 0.39 $\pm$ 0.78                | 0.02    |
| MVI score, mean $\pm$ SD                                                     | 0.44 $\pm$ 1.03        | 0.38 $\pm$ 0.90               | 0.57 $\pm$ 1.24                | 0.56    |
| cg score, mean $\pm$ SD                                                      | 1.10 $\pm$ 0.35        | 1.10 $\pm$ 0.38               | 1.09 $\pm$ 0.29                | 0.89    |
| ah score, mean $\pm$ SD                                                      | 2.40 $\pm$ 1.06        | 2.53 $\pm$ 1.01               | 2.17 $\pm$ 1.11                | 0.21    |
| cv score, mean $\pm$ SD <sup>b</sup>                                         | 2.57 $\pm$ 1.02        | 2.57 $\pm$ 1.01               | 2.35 $\pm$ 1.04                | 0.35    |
| <b>Pathologic primary diagnosis</b>                                          |                        |                               |                                |         |
| Inadequate, n (%)                                                            | 4 (6.3)                | 2 (5.0)                       | 2 (8.7)                        | 0.97    |
| BKVN, n (%)                                                                  | 15 (23.8)              | 11 (27.5)                     | 4 (17.4)                       | 0.55    |
| Acute rejection, n (%)                                                       | 9 (14.3)               | 4 (10.0)                      | 5 (21.7)                       | 0.36    |
| Normal, n (%)                                                                | 3 (4.8)                | 2 (5.0)                       | 1 (4.4)                        | 0.62    |
| Other lesions, n (%) <sup>c</sup>                                            | 33 (52.4)              | 22 (55.0)                     | 11 (47.8)                      | 0.77    |
| <b>BKV infection characteristics</b>                                         |                        |                               |                                |         |
| Time from 1 <sup>st</sup> blood BKV-positive PCR to biopsy (d), median (IQR) | 43 (113.0)             | 45.5 (127.8)                  | 43 (70.5)                      | 0.84    |

|                                                                              |              |              |              |         |
|------------------------------------------------------------------------------|--------------|--------------|--------------|---------|
| Time from peak DNAemia to biopsy (d), <i>median (IQR)</i>                    | 0 (40.5)     | 0 (44.3)     | 0 (54.0)     | 0.20    |
| BKV viral load at biopsy ( $\text{Log}_{10}$ copies/mL), <i>median (IQR)</i> | 3.4 (1.8)    | 3.2 (1.9)    | 3.4 (1.7)    | 0.59    |
| Peak BKV viral load ( $\text{Log}_{10}$ copies/mL), <i>median (IQR)</i>      | 4.6 (1.8)    | 4.4 (1.8)    | 4.8 (1.5)    | 0.16    |
| <b>Laboratory test results at the time of biopsy</b>                         |              |              |              |         |
| Serum creatinine ( $\mu\text{mol/L}$ ), <i>mean<math>\pm</math>SD</i>        | 163 $\pm$ 51 | 162 $\pm$ 53 | 165 $\pm$ 47 | 0.67    |
| DSAs, <i>n (%)</i> <sup>d</sup>                                              | 22 (34.9)    | 11 (30.6)    | 11 (47.8)    | 0.29    |
| Proteinuria/creatininuria ratio (g/g), <i>mean<math>\pm</math>SD</i>         | 0.38 (0.6)   | 0.37 (0.6)   | 0.39 (0.4)   | 0.19    |
| Urinary CXCL10 ( $\text{LnCXCL10/cr}$ ), <i>median (IQR)</i>                 | 2.21 (1.2)   | 1.94 (1.3)   | 3.02 (0.8)   | <0.0001 |

Abbreviations: ah, arteriolar hyalinosis; BKVN, BKV-associated nephropathy; cg, allograft glomerulopathy; ci, interstitial fibrosis; ct, tubular atrophy; cv, chronic vascular changes; DSAs, donor-specific antibodies; g, glomerulitis; i, interstitial infiltrate; IFTA, interstitial fibrosis/tubular atrophy; IQR, interquartile range; Ln, natural logarithm; MVI, microvascular inflammation; PCR, polymerase chain reaction; ptc, peritubular capillaritis; SD, standard deviation; t, tubulitis; ti, total inflammation; v, vasculitis. <sup>a</sup> Data not available (NA) for 1 case, <sup>b</sup> NA=8, <sup>c</sup> Including calcineurin inhibitor toxicity, IFTA and recurrent disease, <sup>d</sup> NA=4.

**Supplemental Table 5:** Patient and transplant characteristics in the longitudinal study including 60 single patients with BKV-DNAemia.

| <b>Variables</b>                                      | <b>N=60 patients</b> |
|-------------------------------------------------------|----------------------|
| <b>Recipient characteristics</b>                      |                      |
| Men, <i>n (%)</i>                                     | 36 (60.0)            |
| Age at transplantation (yr), <i>mean±SD</i>           | 53.6 (15)            |
| Cause of ESRD                                         |                      |
| GN, <i>n (%)</i>                                      | 15 (25.0)            |
| Diabetes, <i>n (%)</i>                                | 5 (8.3)              |
| Cystic/hereditary/congenital, <i>n (%)</i>            | 24 (40.0)            |
| Secondary GN, <i>n (%)</i>                            | 4 (6.7)              |
| Hypertension, <i>n (%)</i>                            | 1 (1.7)              |
| Interstitial nephritis, <i>n (%)</i>                  | 2 (3.3)              |
| Miscellaneous conditions, <i>n (%)</i>                | 2 (3.3)              |
| Etiology uncertain, <i>n (%)</i>                      | 7 (11.7)             |
| <b>Transplant variables</b>                           |                      |
| Donor age (yr), <i>mean±SD</i>                        | 56.3 (18)            |
| Donor type                                            |                      |
| Living donor, <i>n (%)</i>                            | 13 (21.7)            |
| SCD, <i>n (%)</i>                                     | 16 (26.7)            |
| ECD, <i>n (%)</i>                                     | 29 (48.3)            |
| DCD, <i>n (%)</i>                                     | 2 (3.3)              |
| Retransplantation, <i>n (%)</i>                       | 17 (28.3)            |
| Delayed graft function, <i>n (%)</i>                  | 8 (13.3)             |
| Preformed DSAs, <i>n (%)</i>                          | 39 (65.0)            |
| <b>Immunosuppressive protocol</b>                     |                      |
| Induction therapy, <i>n (%)</i>                       |                      |
| Basiliximab/Thymoglobuline®, <i>n (%)</i>             | 22 (36.7)/38 (63.3)  |
| Calcineurin inhibitor, <i>n (%)</i>                   |                      |
| Cyclosporin/tacrolimus, <i>n (%)</i>                  | 0 (0)/60 (100)       |
| Mycophenolic acid, <i>n (%)</i>                       | 55 (91.7)            |
| Mammalian target of rapamycin inhibitor, <i>n (%)</i> | 5 (8.3)              |
| Steroids, <i>n (%)</i>                                | 60 (100)             |

Abbreviations: DCD, donation after cardiac death; DSAs, donor-specific antibodies; ECD, expanded-criteria donor; ESRD, end-stage renal disease; GN, glomerulonephritis; SCD, standard-criteria donor; SD, standard deviation.

**Supplemental Figure 1:** Correlation analyses in the cross-sectional study. **(A)** Correlation between blood and urine BKV viral load. **(B)** Correlation between uCXCL10 and urine BKV viral load in a restricted population after exclusion of possible confounders. **(C)** Correlation between uCXCL10 and urine protein output in all samples with BKV DNAemia. Correlations were computed using Pearson's tests. Abbreviations: UTI, urinary tract infection.

**A**

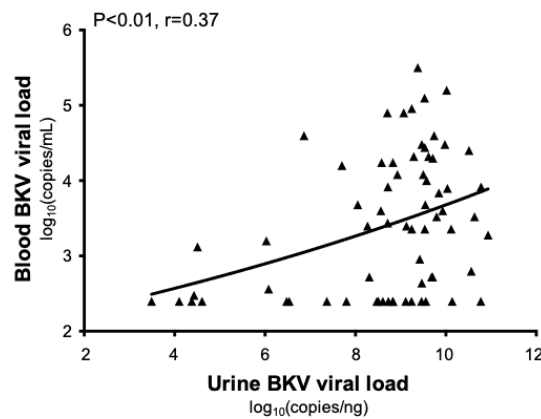

**Global population of patients with viremia:** N=76 samples of whom 68 have concurrent viruria, see Fig 2A)

**B**

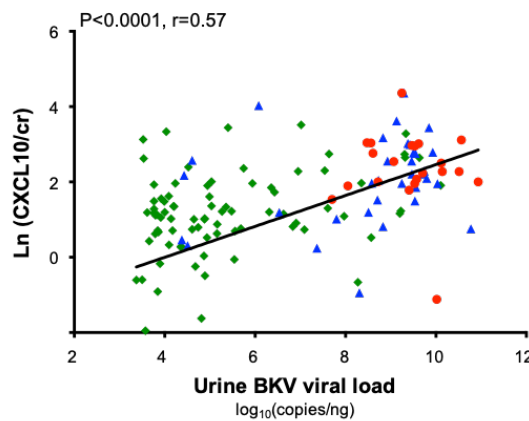

**Restricted population of patients with viremia:** N=158 samples (after exclusion of N=13 UTI cases and/or N=35 acute rejection cases)

**C**

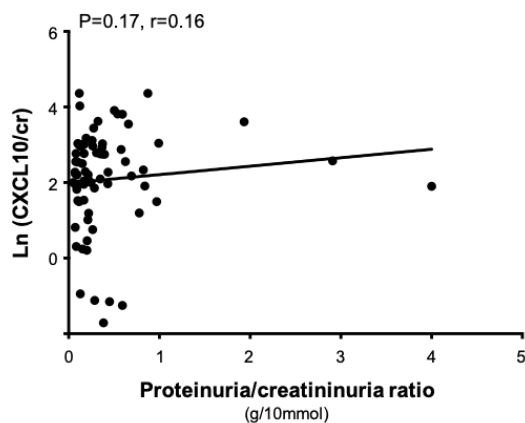

**Global population of patients with viremia:** N=76 samples of whom proteinuria was available for 74 samples



**Supplemental Figure 2:** Relationship between the rejection phenotypes observed at the time of index biopsy for concurrent BKV-DNAemia and the post-BKV occurrence of rejection in the low-CXCL10 ( $\leq 12.86$  ng/mmol) and high-CXCL10 ( $>12.86$  ng/mmol) groups from the nested case-control study. Dashed lines indicate a change in category from no rejection to rejection (i.e., *de novo* rejection, in black) or the opposite from rejection to no rejection (in gray). Solid lines indicate patients staying within the same category: with a rejection diagnosis at the time of index biopsy and a post-BKV persistent/recurrent rejection (in black) or no rejection at any time (in gray).

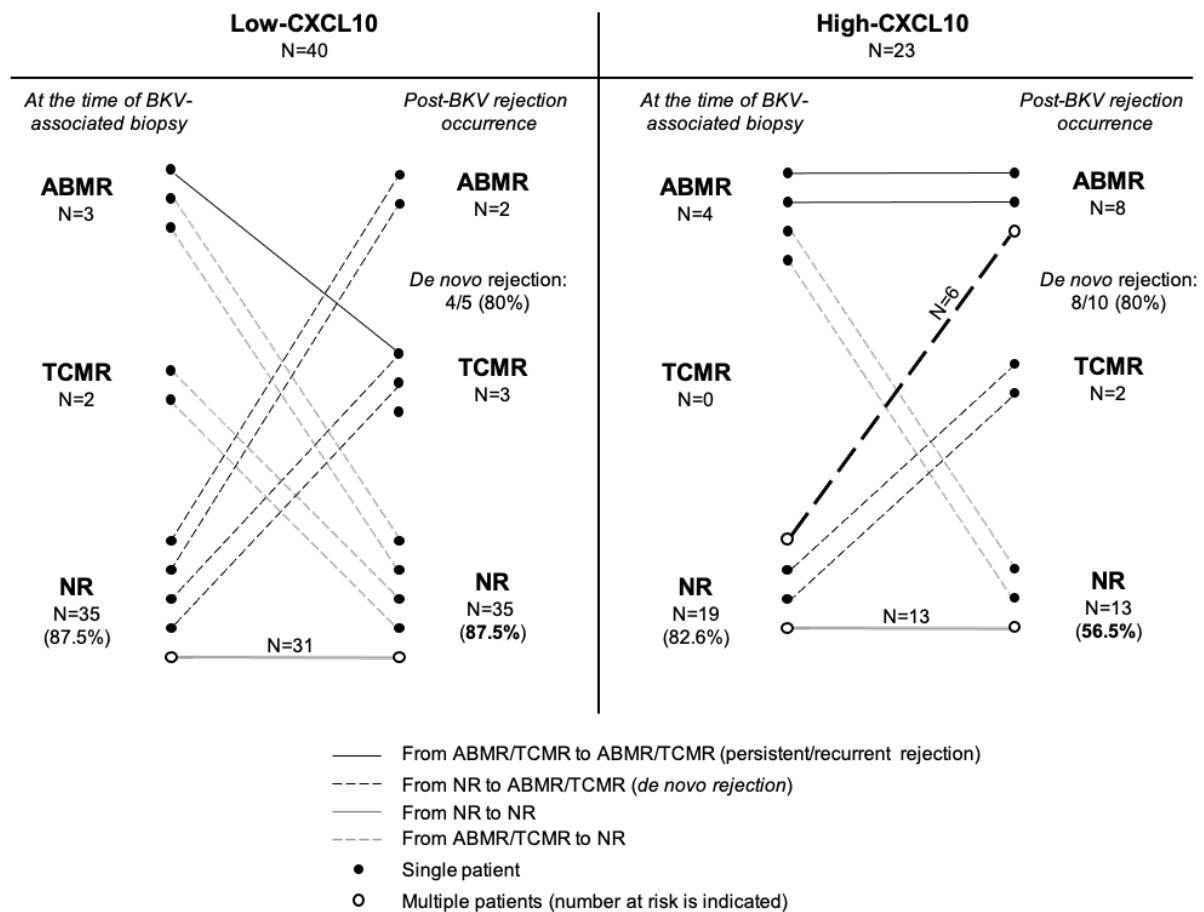

**Supplemental Figure 3:** Urinary CXCL10/cr (A) and blood BKV viral load (B) trajectory analyses in the longitudinal cohort split in three groups according to AST Guidelines (Hirsch *et al*, Clin Transplant 2019). Transient BKV-DNAemia is defined by spontaneous BKV clearance without lowering of maintenance immunosuppression (N=18, light gray line). Sustained low-level BKV-DNAemia is defined by peak viremia <4 log<sub>10</sub>c/mL (N=27 KTRs, dark gray line). Sustained high-level DNAemia is defined by peak viremia ≥4 log<sub>10</sub>c/mL (N=13 KTRs, black line). Trajectories were computed by regression from longitudinal assessments of uCXCL10/cr (samples collected at biopsy and each outpatient clinic visit during the 1<sup>st</sup> year post-transplantation) and all available blood BKV viral loads over the same period.

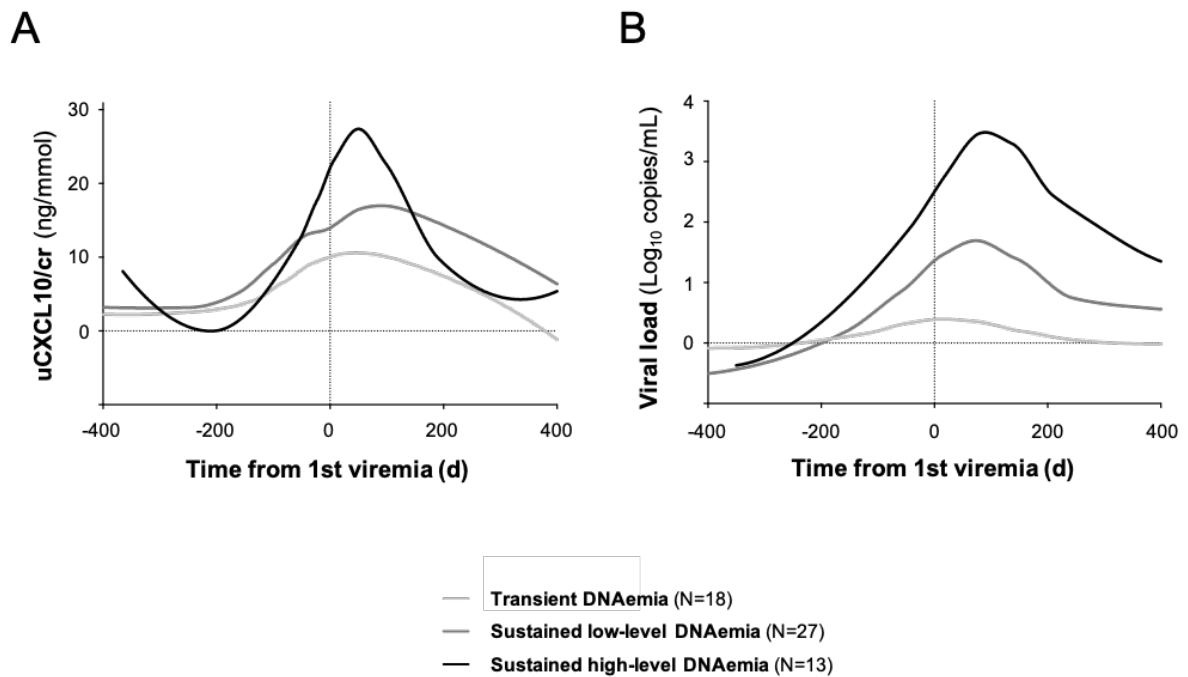

Supplement: DataSheet_1.pdf [file DataSheet_1.pdf]
